# Supplementary material for: Moisture transport and Antarctic sea ice: austral spring 2016 event
Source: Copernicus journal article supplement (doi:10.5194/esd-9-939-2018), 2018-07-04
Supplement: Supplementary file 1 [file esd-9-939-2018-supplement.pdf]

Supplement of Earth Syst. Dynam., 9, 939–954, 2018  
<https://doi.org/10.5194/esd-9-939-2018-supplement>  
© Author(s) 2018. This work is distributed under  
the Creative Commons Attribution 4.0 License.

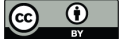

*Supplement of*

## **Moisture transport and Antarctic sea ice: austral spring 2016 event**

**Monica Ionita et al.**

*Correspondence to:* Monica Ionita ([monica.ionita@awi.de](mailto:monica.ionita@awi.de))

The copyright of individual parts of the supplement might differ from the CC BY 4.0 License.

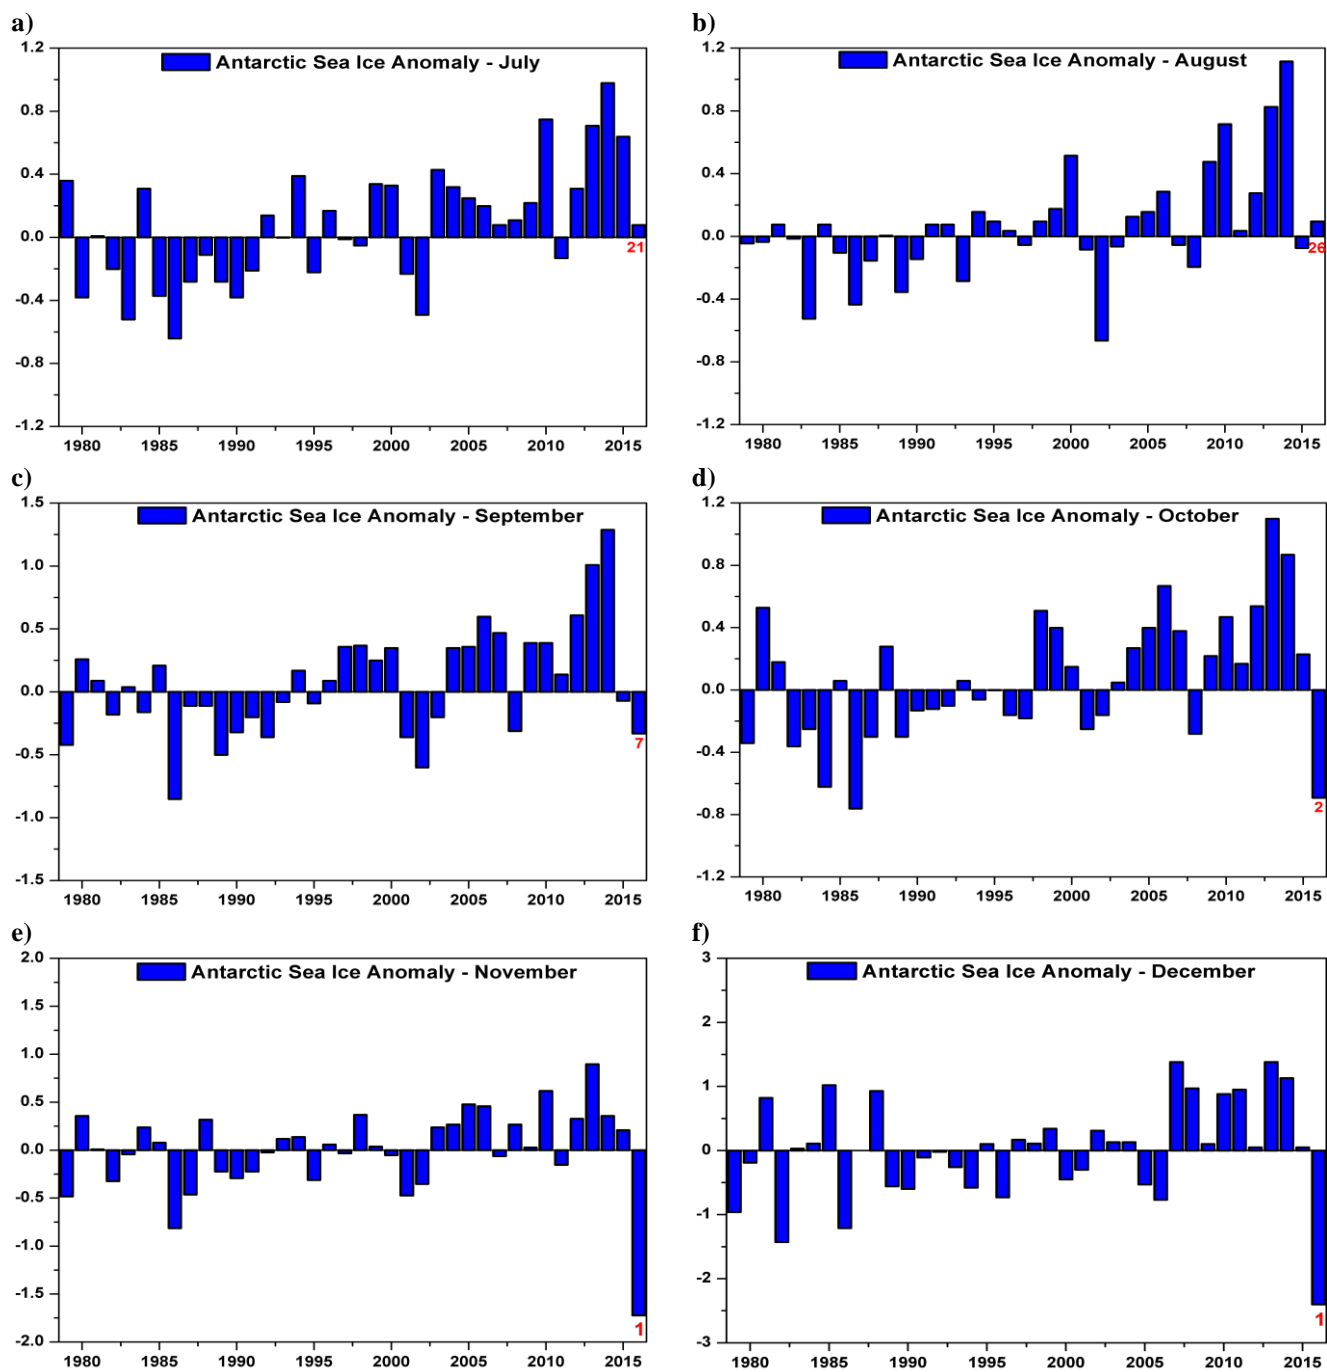

**Figure S1.** Monthly Antarctic sea ice extent anomalies ( $10^6 \text{ km}^2$ ) from 1979 to 2016: a) July; b) August; c) September; d) October; e) November and f) December. The red number in 2016 indicates the rank of the respective month over the period 1979 - 2016. “1” indicates the month with the lowest SIE anomaly; “2” indicates the month with the 2<sup>nd</sup> lowest SIE anomaly, etc.

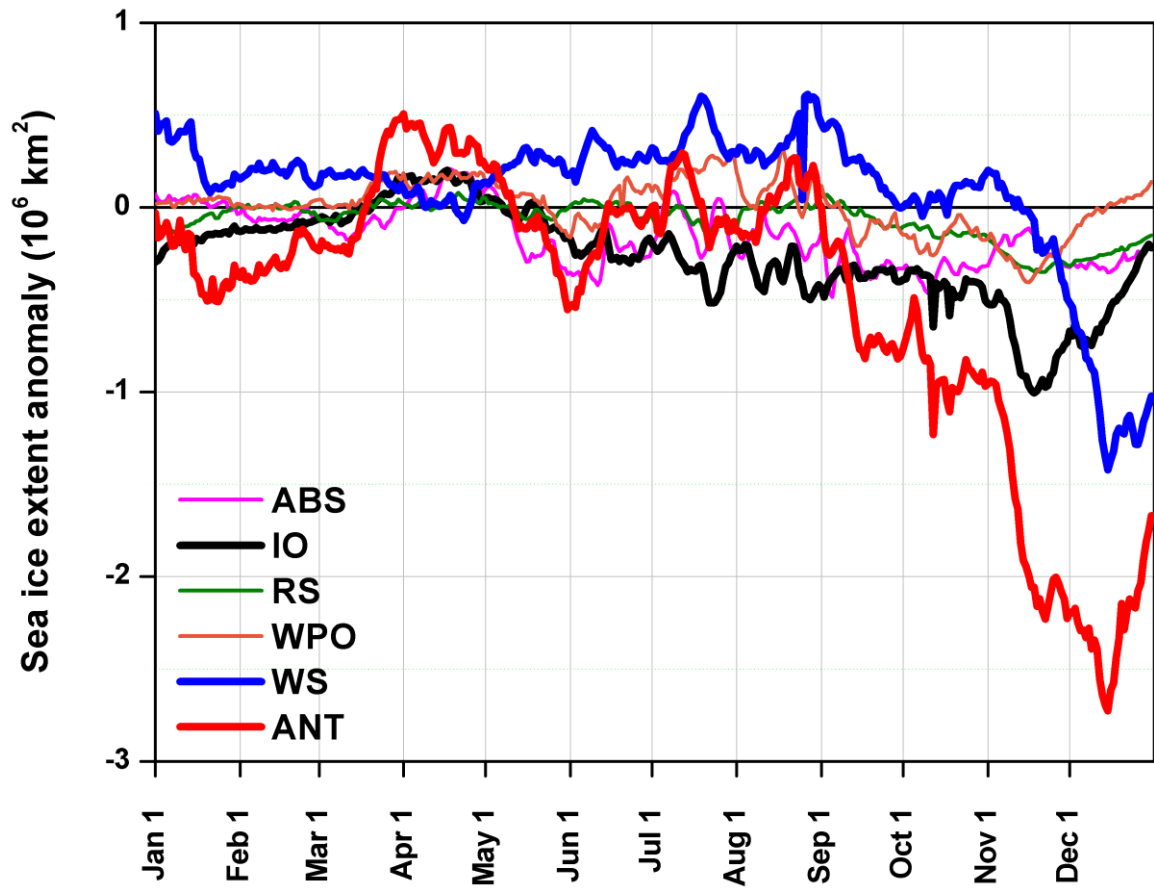

**Figure S2.** Daily sea ice extent anomalies for the year 2016 with respect to reference period 1981 - 2010: Amundsen - Bellingshausen Sea (ABS - magenta), Indian Ocean (IO - black), Ross Sea (RS - green), Western Pacific Ocean (WPO - orange), Weddell Sea (WS - blue) and Antarctica (red).

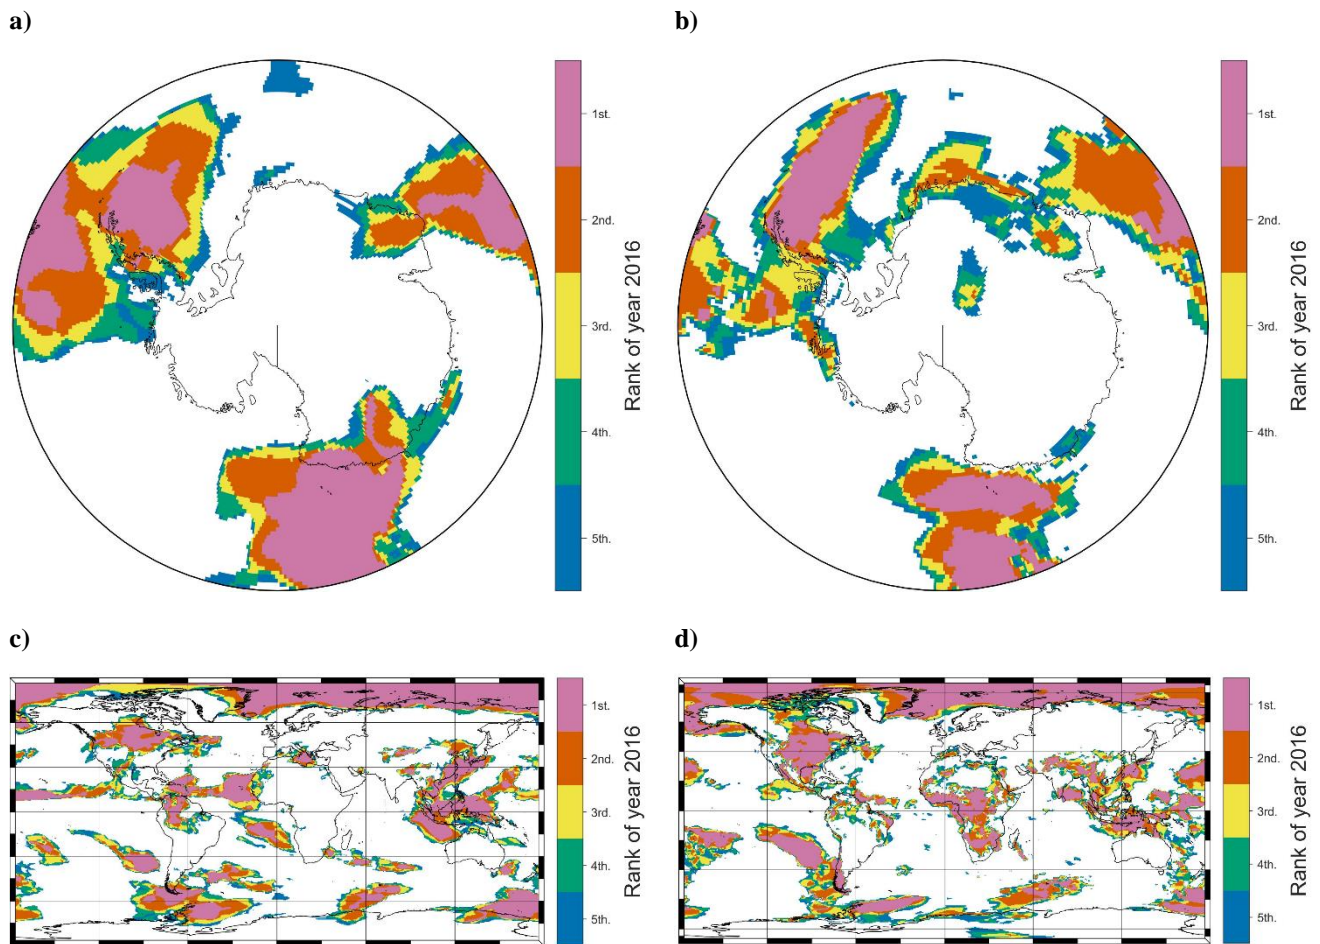

**Figure S3.** Ranking of autumn (SON) 2016: a) The vertical integral of water vapor (IWV, '1' means the moistest month over the analyzed period) over the Southern hemisphere; b) 2m air temperature (T2m, '1' means the warmest month over the analyzed period) over the Southern Hemisphere; c) as in a) but globally and d) as in b) but globally. Analyzed period: 1979–2016. Rankings below 5 appear white.
